# Supplementary material for: Fluorescent Light Incites a Conserved Immune and Inflammatory Genetic Response within Vertebrate Organs (Danio rerio, Oryzias latipes and Mus musculus)
Source: MDPI journal article supplement (doi:10.3390/genes10040271), 2019-04-03
Supplement: s1 [file s1]

Figure S3- Liver

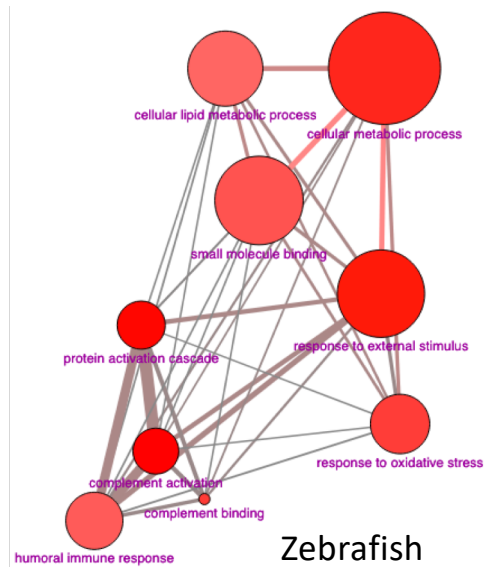

Zebrafish

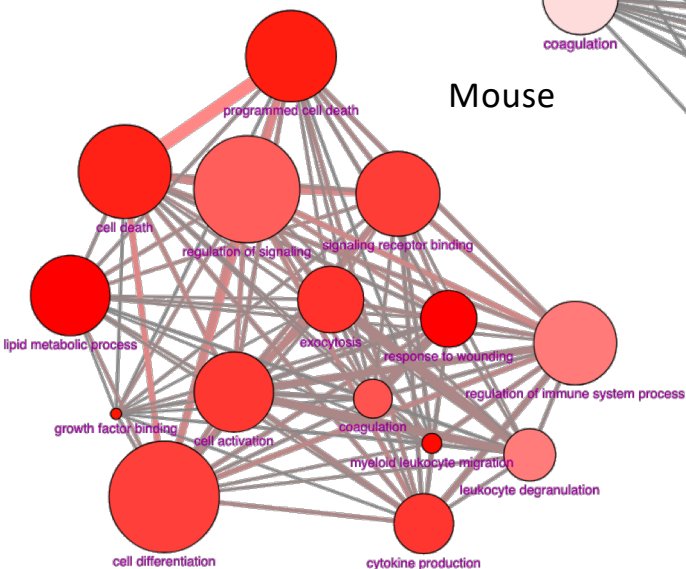

Mouse

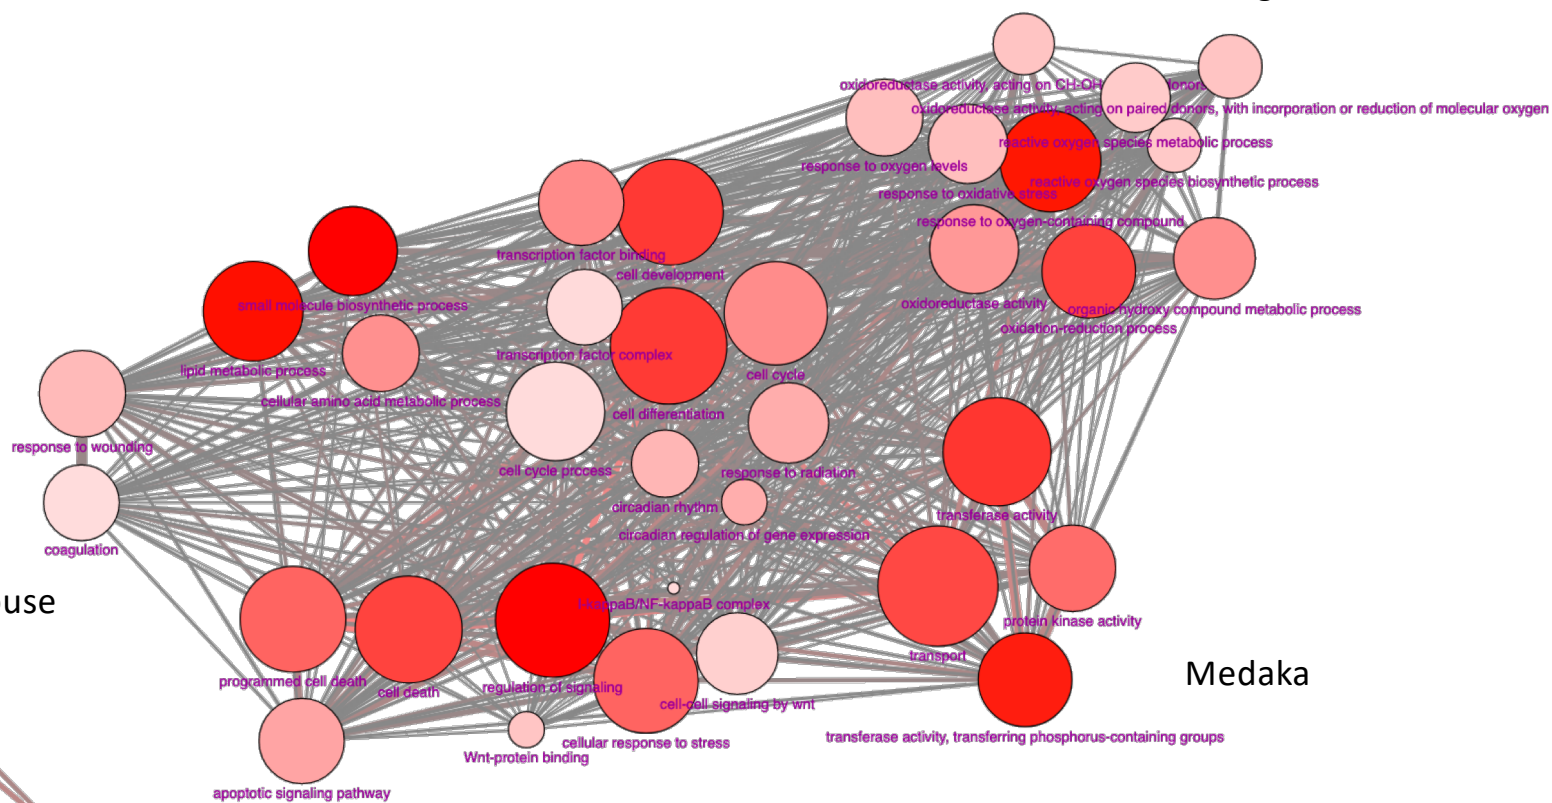

Medaka

| Node label color                                        | Node size (# genes) | Node color (p value) | Edge width (% shared genes) | Edge color (genes from input) |
|---------------------------------------------------------|---------------------|----------------------|-----------------------------|-------------------------------|
| The node label color denotes the type of the gene sets: | 9 genes             | $p < 10^{-10}$       | 1%                          | 37                            |
| neighborhood-based set                                  | 94 genes            | $p < 10^{-5}$        | 50%                         | 18                            |
| manually curated pathway                                | 994 genes           | $p = 1.0$            | 100%                        | 0                             |
| Gene Ontology category                                  |                     |                      |                             |                               |
| protein complex                                         |                     |                      |                             |                               |
