# Supplementary figures and images for: Fluorescent Light Incites a Conserved Immune and Inflammatory Genetic Response within Vertebrate Organs (Danio rerio, Oryzias latipes and Mus musculus)
Source: MDPI journal article supplement (doi:10.3390/genes10040271), 2019-04-03

Figure S1- Skin

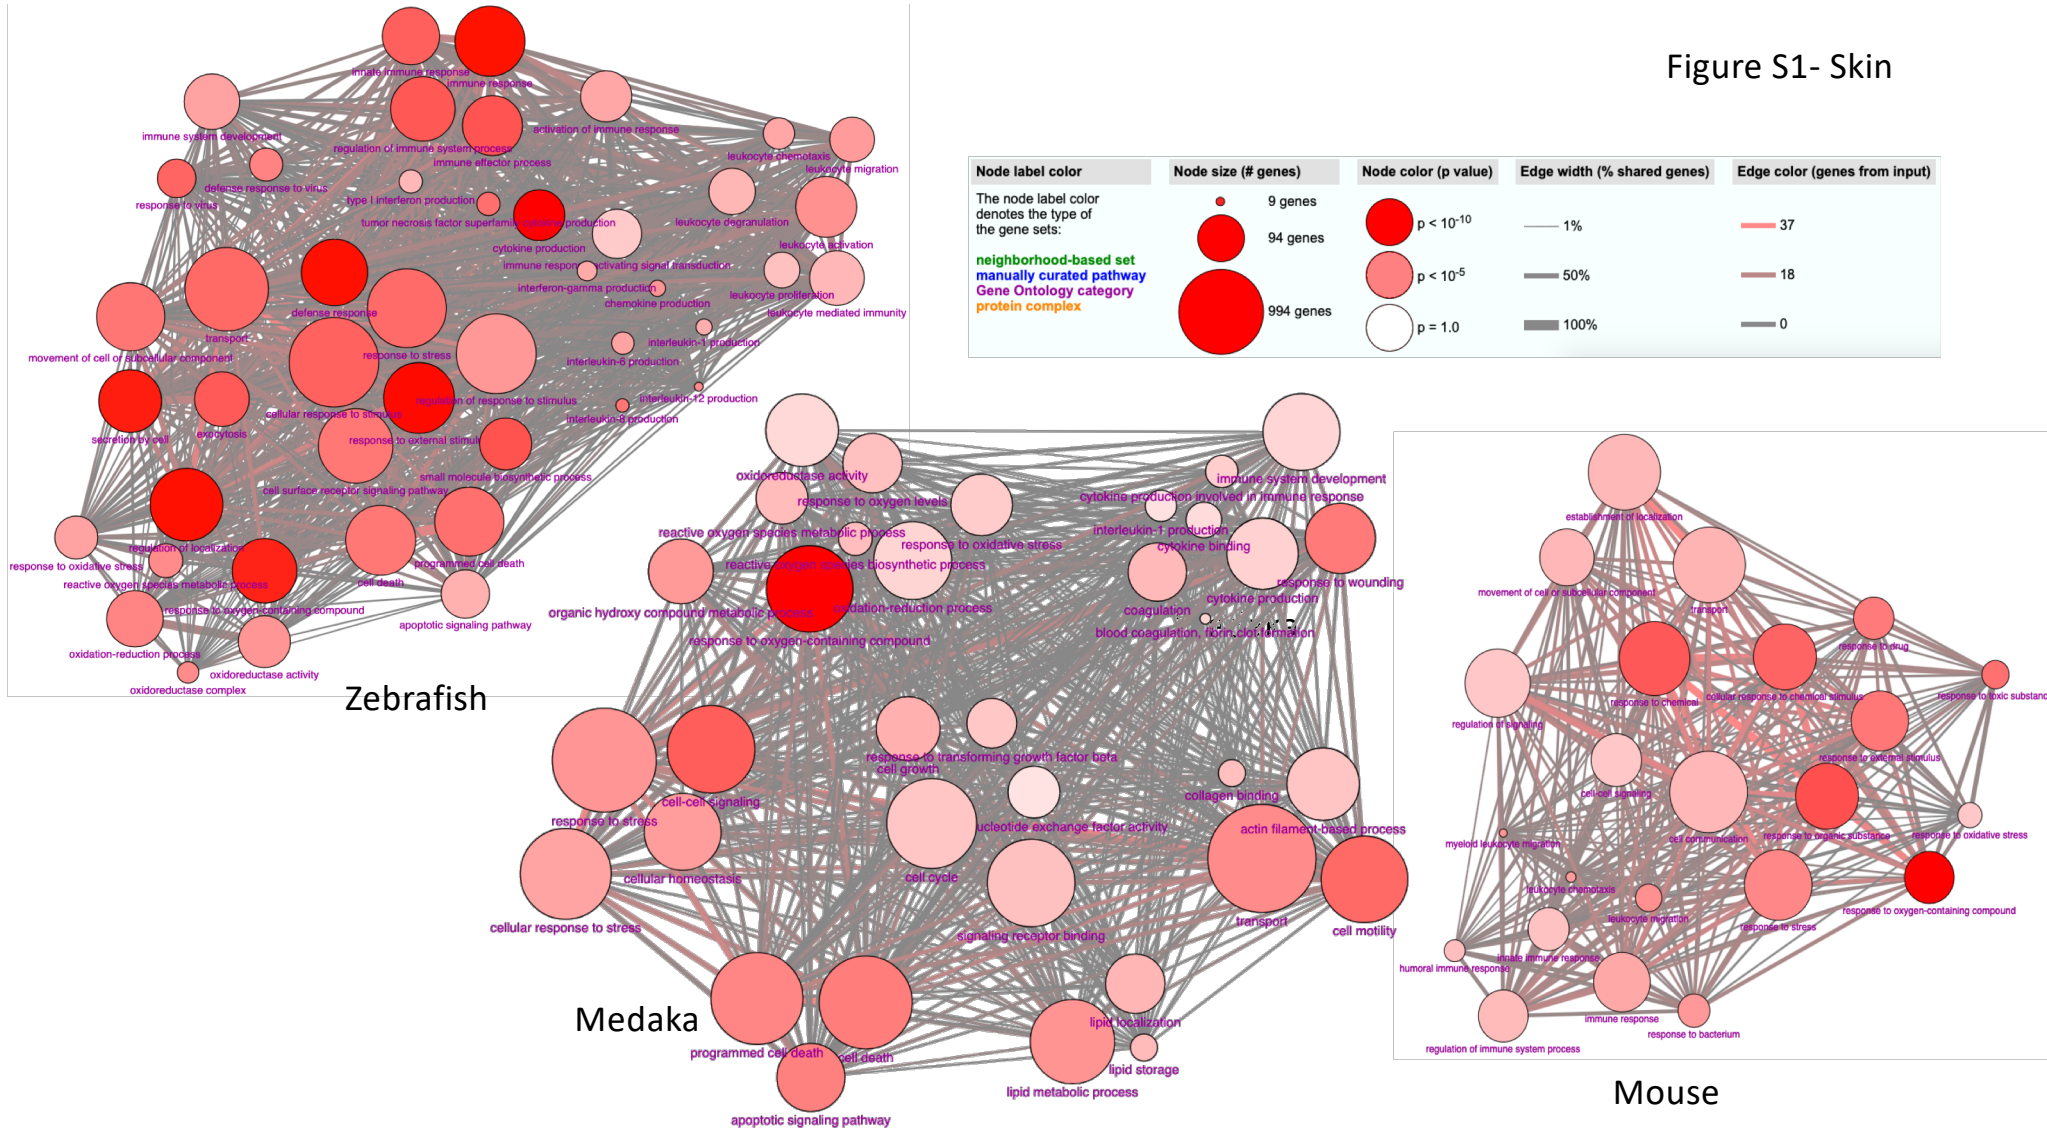

Supplement: s1 [file s1]

Figure S4

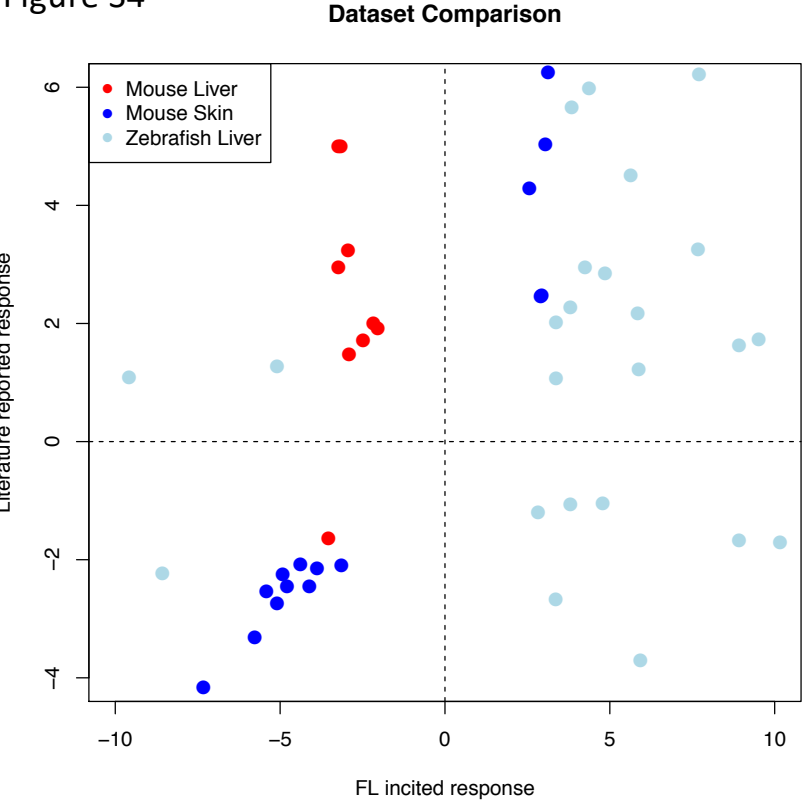

Supplement: s1 [file s1]

Figure S2- Brain

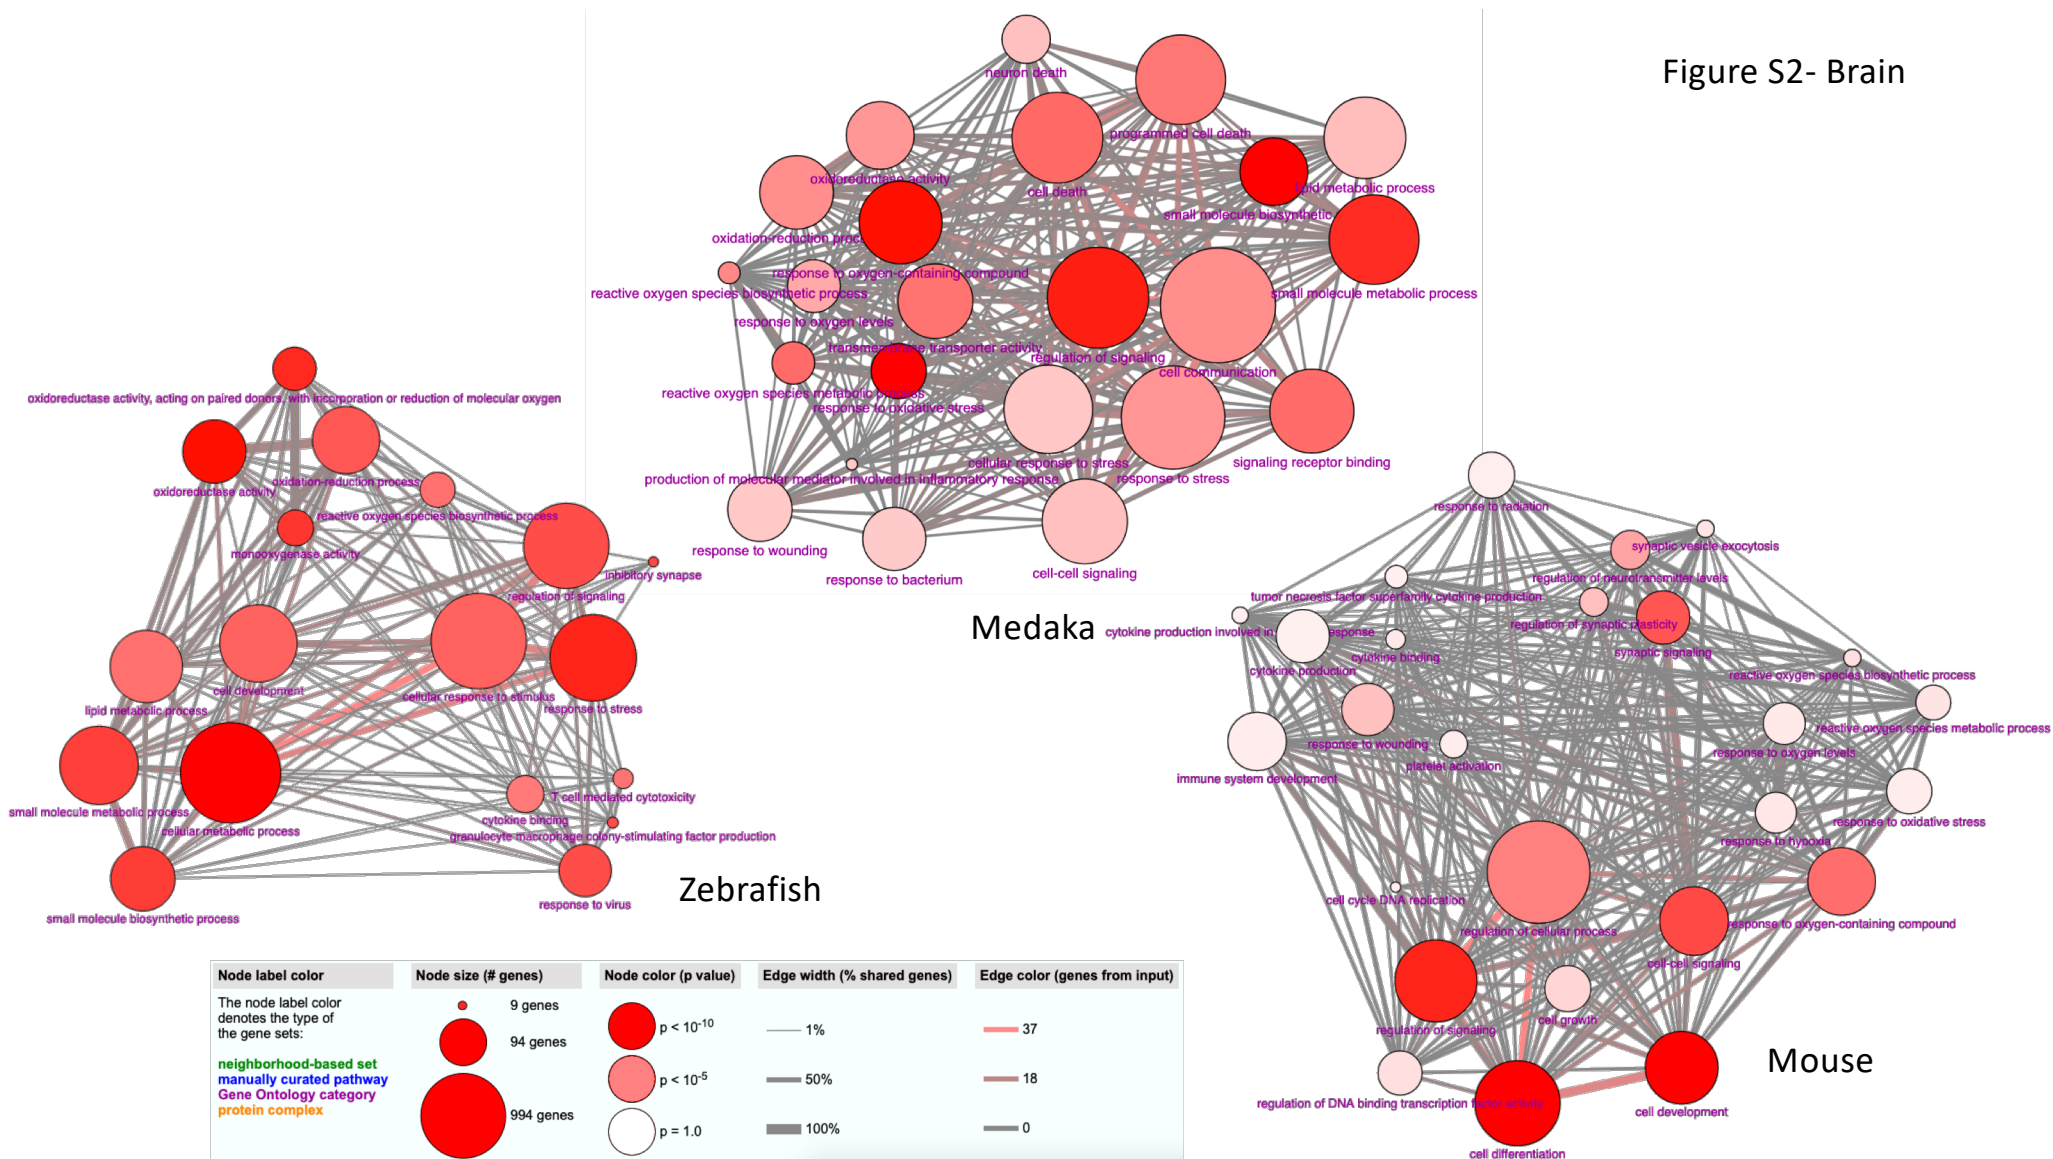

Supplement: s1 [file s1]
